# Supplementary material
Source: MDPI journal article supplement (https://www.mdpi.com/2227-9040/7/3/44)
Supplement: s1 [file s1]

# One-Step Polylactic Acid Screen-Printing Microfluidic Paper-Based Analytical Device: Application for Simultaneous Detection of Nitrite and Nitrate in Food Samples

Siriwan Teepoo \*, Supattra Arsawiset and Pitchayatida Chanayota

Department of Chemistry, Faculty of Science and Technology, Rajamangala University of Technology Thanyaburi, Pathum Thani 12110, Thailand; [arsawiset.supattra@gmail.com](mailto:arsawiset.supattra@gmail.com) (S.A.); [pitchayatida.jan@gmail.com](mailto:pitchayatida.jan@gmail.com) (P.C.)

\* Correspondence: [siriwan@mail.rmutt.ac.th](mailto:siriwan@mail.rmutt.ac.th); Tel.: +66-02-549-3529

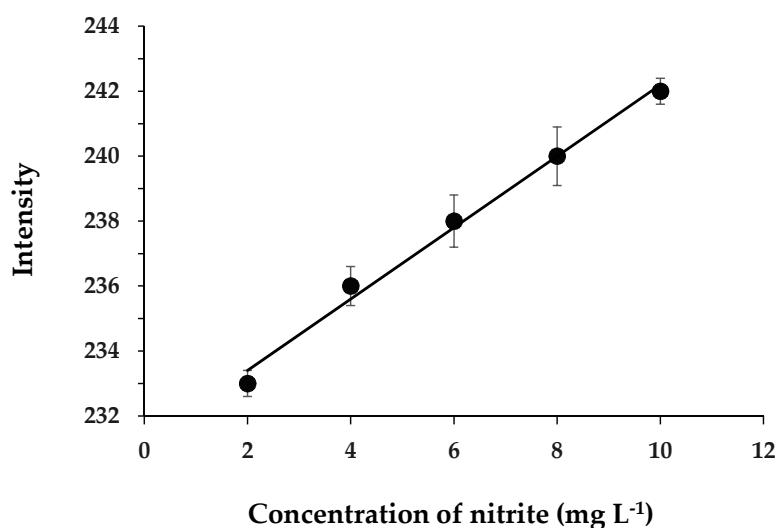

Figure S1. Calibration curves for nitrite.

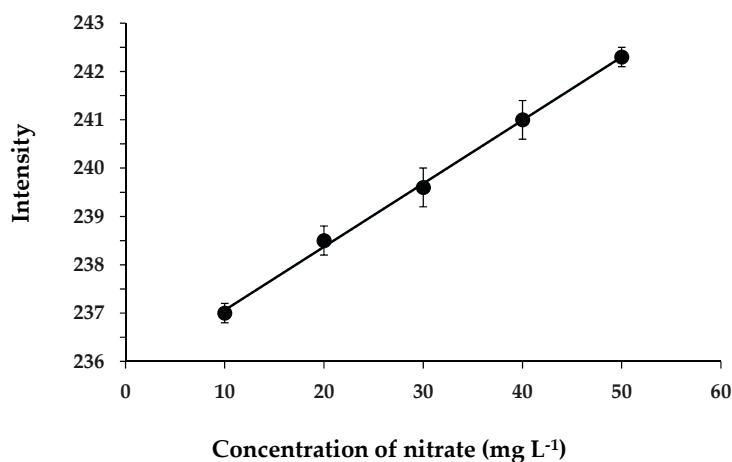

Figure S2. Calibration curves for nitrate.

**Table S1.** The comparison between different methods used for detection of nitrite and nitrate in food samples.

| Analyze             | Real Sample                                                      | Analytical Method                                              | Remarked                                                                                                                                                       | [Ref]     |
|---------------------|------------------------------------------------------------------|----------------------------------------------------------------|----------------------------------------------------------------------------------------------------------------------------------------------------------------|-----------|
| nitrate and nitrite | smoked sausage, chicken sausage, fish ball, meatballs, sour pork | μPAD                                                           | nitrite and nitrate reaction on chromatography paper and using scanner as detector                                                                             | This work |
| nitrate and nitrite | tuna fish, tomato paste, infant food                             | electrothermal atomic absorption spectrometry                  | Indirect method; nitrite and nitrate were complex with Cu(I)-neocuproine before detection and also required liquid microextraction before real sample analysis | [1]       |
| nitrite and nitrate | cheese, salam, Sausage                                           | gas chromatography–mass spectrometry and liquid chromatography | nitrite was derivatized with 2,3-naphthotriazole to form fluorescent compound                                                                                  | [2]       |
| nitrite             | chips, pickle food, pickled vegetables                           | amperometry                                                    | using tetrasulfonated copper phthalocyanine modified glassy carbon electrode as working electrode                                                              | [3]       |
| nitrite and nitrate | skim milk, whole milk, hydrolysate, buttermilk, infant formula   | ion-exchange chromatography                                    | required coupled post-column reduction of nitrate and derivatisation via Griess chemistry                                                                      | [4]       |
| nitrite and nitrate | baby foods                                                       | flow injection analysis                                        | employing sulfanilamide and N-(1-naphthyl)ethylenediamine dihydrochloride as color reagents                                                                    | [5]       |

## References

- [1] Roohparvar, R.; Shamspur, T.; Mostafavi, A.; Bagheri, H. Indirect ultra-trace determination of nitrate and nitrite in food samples by in-syringe liquid microextraction and electrothermal atomic absorption spectrometry. *Microchem J.* **2018**, *142*, 135–139.
- [2] Akyuz, M.; Ata, S. Determination of low level nitrite and nitrate in biological, food and environmental samples by gas chromatography–mass spectrometry and liquid chromatography with fluorescence detection. *Talanta.* **2009**, *79*, 900–904.
- [3] Sudarvizhi, A.; Pandian, K.; Oluwafemi, OS.; Gopinathd, SCB. Amperometry detection of nitrite in food samples using tetrasulfonated copper phthalocyanine modified glassy carbon electrode. *Sens. Actuators. B. Chem.* **2018**, *272*, 151–159.
- [4] Gapper, LW.; Fong, BY.; Otter, DE.; Indyk, HE.; Woollard, DC. Determination of nitrite and nitrate in dairy products by ion exchange LC with spectrophotometric detection. *Int. Dairy. J.* **2004**, *14*, 881–887.
- [5] Chetty, AA.; Prasad, S. Flow injection analysis of nitrate and nitrite in commercial baby foods. *Food Chem.* **2016**, *197*, 503–508.
